# Supplementary material
Source: PubMed Central journal article supplement (PMC7529865)
Supplement: NIHMS1601192-supplement-10928_2020_9691_MOESM1_ESM.pdf [file NIHMS1601192-supplement-10928_2020_9691_MOESM1_ESM.pdf]

# Predicting monoclonal antibody pharmacokinetics following subcutaneous administration via whole-body physiologically-based modeling

Shihao Hu and David Z. D'Argenio

Department of Biomedical Engineering, University of Southern California, Los Angeles, CA, USA

## Supplementary Material

The supplementary material below includes the list of model equations. See Table 3 in the manuscript for definition of parameters and variables.

### Lung

#### Vascular space

$$\begin{aligned}
 V_{\text{vasc}}^{\text{Lung}} \cdot \frac{dCIgG_{\text{vasc}}^{\text{Lung}}}{dt} &= Q^{\text{Lung}} \cdot CIgG^{\text{Plasma}} - (Q^{\text{Lung}} - L^{\text{Lung}}) \cdot CIgG_{\text{vasc}}^{\text{Lung}} \\
 &- CL_{\text{pino}}^{\text{Lung}} \cdot CIgG_{\text{vasc}}^{\text{Lung}} + fIgG_{\text{recyc}} \cdot CL_{\text{pino}}^{\text{Lung}} \cdot CIgFc_{\text{recyc}}^{\text{Lung}} \\
 &- PS_L^{\text{Lung}} \cdot (CIgG_{\text{vasc}}^{\text{Lung}} - CIgG_{\text{inter}}^{\text{Lung}}) \cdot \frac{Pe_L}{e^{Pe_L} - 1} - PS_S^{\text{Lung}} \cdot (CIgG_{\text{vasc}}^{\text{Lung}} - CIgG_{\text{inter}}^{\text{Lung}}) \cdot \frac{Pe_S}{e^{Pe_S} - 1} \\
 &- J_L^{\text{Lung}} \cdot (1 - \sigma_L) \cdot CIgG_{\text{vasc}}^{\text{Lung}} - J_S^{\text{Lung}} \cdot (1 - \sigma_S) \cdot CIgG_{\text{vasc}}^{\text{Lung}}
 \end{aligned} \tag{1}$$

$$\begin{aligned}
 V_{\text{vasc}}^{\text{Lung}} \cdot \frac{dCmAb_{\text{vasc}}^{\text{Lung}}}{dt} &= Q^{\text{Lung}} \cdot CmAb^{\text{Plasma}} - (Q^{\text{Lung}} - L^{\text{Lung}}) \cdot CmAb_{\text{vasc}}^{\text{Lung}} \\
 &- S_{\text{pino}}^{\text{Lung}} \cdot CL_{\text{pino}}^{\text{Lung}} \cdot CmAb_{\text{vasc}}^{\text{Lung}} + S_{\text{pino}} \cdot fIgG_{\text{recyc}} \cdot CL_{\text{pino}}^{\text{Lung}} \cdot CmAbFc_{\text{recyc}}^{\text{Lung}} \\
 &- S_{\text{diff-conv}}^{\text{Lung}} \cdot PS_L^{\text{Lung}} \cdot (CmAb_{\text{vasc}}^{\text{Lung}} - CmAb_{\text{inter}}^{\text{Lung}}) \cdot \frac{Pe_L}{e^{Pe_L} - 1} - S_{\text{diff-conv}} \cdot PS_S^{\text{Lung}} \cdot (CmAb_{\text{vasc}}^{\text{Lung}} - CmAb_{\text{inter}}^{\text{Lung}}) \cdot \frac{Pe_S}{e^{Pe_S} - 1} \\
 &- S_{\text{diff-conv}}^{\text{Lung}} \cdot J_L^{\text{Lung}} \cdot (1 - \sigma_L) \cdot CmAb_{\text{vasc}}^{\text{Lung}} - S_{\text{diff-conv}} \cdot J_S^{\text{Lung}} \cdot (1 - \sigma_S) \cdot CmAb_{\text{vasc}}^{\text{Lung}}
 \end{aligned} \tag{2}$$

#### Vascular Endothelial Cell Endosomal Space Sub-compartment 1 (pH=7.4)

$$\begin{aligned}
 \frac{dCIgG_{7.4}^{\text{Lung}}}{dt} &= (CL_{\text{pino}}^{\text{Lung}} \cdot CIgG_{\text{vasc}}^{\text{Lung}} + CL_{\text{pino}}^{\text{Lung}} \cdot CIgG_{\text{inter}}^{\text{Lung}}) / V_{\text{endo,sub}}^{\text{Lung}} \\
 &+ k_{\text{off}}^{7.4} \cdot CIgFc_{7.4}^{\text{Lung}} - k_{\text{on}}^{7.4} \cdot CIgG_{7.4}^{\text{Lung}} \cdot CFcRn_{7.4}^{\text{Lung}} - \frac{1}{\tau} \cdot CIgG_{7.4}^{\text{Lung}}
 \end{aligned} \tag{3}$$

$$\frac{dCIgFc_{7.4}^{\text{Lung}}}{dt} = k_{\text{on}}^{7.4} \cdot CIgG_{7.4}^{\text{Lung}} \cdot CFcRn_{7.4}^{\text{Lung}} - k_{\text{off}}^{7.4} \cdot CIgFc_{7.4}^{\text{Lung}} - \frac{1}{\tau} \cdot CIgFc_{7.4}^{\text{Lung}} \tag{4}$$

$$\begin{aligned} \frac{dCmAb_{7.4}^{Lung}}{dt} &= (S_{pino} \cdot CL_{pino}^{Lung} \cdot CmAb_{vasc}^{Lung} + S_{pino} \cdot CL_{pino}^{Lung} \cdot CmAb_{inter}^{Lung}) / V_{endo,sub}^{Lung} \\ &+ k_{off}^{7.4} \cdot CmAbFc_{7.4}^{Lung} - k_{on}^{7.4} \cdot CmAb_{7.4}^{Lung} \cdot CFcRn_{7.4}^{Lung} - \frac{1}{\tau} \cdot CmAb_{7.4}^{Lung} \end{aligned} \quad (5)$$

$$\frac{dCmAbFc_{7.4}^{Lung}}{dt} = k_{on}^{7.4} \cdot CmAb_{7.4}^{Lung} \cdot CFcRn_{7.4}^{Lung} - k_{off}^{7.4} \cdot CmAbFc_{7.4}^{Lung} - \frac{1}{\tau} \cdot CmAbFc_{7.4}^{Lung} \quad (6)$$

The concentration of the FcRn receptor in this first endosomal sub-compartment ( $CFcRn_{pH7.4}^{Lung}$ ) is assumed to be constant [1].

### Vascular Endothelial Cell Endosomal Space Sub-compartment 2 (pH=7.0)

$$\frac{dCIgG_{7.0}^{Lung}}{dt} = k_{off}^{7.0} \cdot CIgFc_{7.0}^{Lung} - k_{on}^{7.0} \cdot CIgG_{7.0}^{Lung} \cdot CFcRn_{7.0}^{Lung} + \frac{1}{\tau} \cdot (CIgG_{7.4}^{Lung} - CIgG_{7.0}^{Lung}) \quad (7)$$

$$\frac{dCIgFc_{7.0}^{Lung}}{dt} = k_{on}^{7.0} \cdot CIgG_{7.0}^{Lung} \cdot CFcRn_{7.0}^{Lung} - k_{off}^{7.0} \cdot CIgFc_{7.0}^{Lung} + \frac{1}{\tau} \cdot (CIgFc_{7.4}^{Lung} - CIgFc_{7.0}^{Lung}) \quad (8)$$

$$\frac{dCmAb_{7.0}^{Lung}}{dt} = k_{off}^{7.0} \cdot CmAbFc_{7.0}^{Lung} - k_{on}^{7.0} \cdot CmAb_{7.0}^{Lung} \cdot CFcRn_{7.0}^{Lung} + \frac{1}{\tau} \cdot (CmAb_{7.4}^{Lung} - CmAb_{7.0}^{Lung}) \quad (9)$$

$$\frac{dCmAbFc_{7.0}^{Lung}}{dt} = k_{on}^{7.0} \cdot CmAb_{7.0}^{Lung} \cdot CFcRn_{7.0}^{Lung} - k_{off}^{7.0} \cdot CmAbFc_{7.0}^{Lung} + \frac{1}{\tau} \cdot (CmAbFc_{7.4}^{Lung} - CmAbFc_{7.0}^{Lung}) \quad (10)$$

$$\begin{aligned} \frac{dCFcRn_{pH7.0}^{Lung}}{dt} &= k_{off}^{7.0} \cdot CIgFc_{7.0}^{Lung} - k_{on}^{7.0} \cdot CIgG_{7.0}^{Lung} \cdot CFcRn_{7.0}^{Lung} \\ &+ k_{off}^{7.0} \cdot CmAbFc_{7.0}^{Lung} - k_{on}^{7.0} \cdot CmAb_{7.0}^{Lung} \cdot CFcRn_{7.0}^{Lung} \\ &+ \frac{1}{\tau} \cdot (CFcRn_{pH7.4}^{Lung} - CFcRn_{pH7.0}^{Lung}) \end{aligned} \quad (11)$$

The differential equations of sub-compartments 3 (pH=6.5) are similar to those of sub-compartment 2.

### Vascular Endothelial Cell Endosomal Space Sub-compartment 4 (pH=6.0)

$$\frac{dCIgG_{6.0}^{Lung}}{dt} = k_{off}^{6.0} \cdot CIgFc_{6.0}^{Lung} - k_{on}^{6.0} \cdot CIgG_{6.0}^{Lung} \cdot CFcRn_{6.0}^{Lung} + \frac{1}{\tau} \cdot (CIgG_{6.5}^{Lung} - CIgG_{6.0}^{Lung}) \quad (12)$$

$$\frac{dCIgFc_{6.0}^{Lung}}{dt} = k_{on}^{6.0} \cdot CIgG_{6.0}^{Lung} \cdot CFcRn_{6.0}^{Lung} - k_{off}^{6.0} \cdot CIgFc_{6.0}^{Lung} + \frac{1}{\tau} \cdot (CIgFc_{6.5}^{Lung} - CIgFc_{6.0}^{Lung}) \quad (13)$$

$$\frac{dCmAb_{6.0}^{Lung}}{dt} = k_{off}^{6.0} \cdot CmAbFc_{6.0}^{Lung} - k_{on}^{6.0} \cdot CmAb_{6.0}^{Lung} \cdot CFcRn_{6.0}^{Lung} + \frac{1}{\tau} \cdot (CmAb_{6.5}^{Lung} - CmAb_{6.0}^{Lung}) \quad (14)$$

$$\frac{dCmAbFc_{6.0}^{Lung}}{dt} = k_{on}^{6.0} \cdot CmAb_{6.0}^{Lung} \cdot CFcRn_{6.0}^{Lung} - k_{off}^{6.0} \cdot CmAbFc_{6.0}^{Lung} + \frac{1}{\tau} \cdot (CmAbFc_{6.5}^{Lung} - CmAbFc_{6.0}^{Lung}) \quad (15)$$

$$\begin{aligned} \frac{dCFcRn_{pH\ 6.0}^{Lung}}{dt} &= k_{off}^{6.0} \cdot CIgFc_{6.0}^{Lung} - k_{on}^{6.0} \cdot CIgG_{6.0}^{Lung} \cdot CFcRn_{6.0}^{Lung} \\ &+ k_{off}^{6.0} \cdot CmAbFc_{6.0}^{Lung} - k_{on}^{6.0} \cdot CmAb_{6.0}^{Lung} \cdot CFcRn_{6.0}^{Lung} \\ &+ \frac{1}{\tau} \cdot (CFcRn_{pH\ 6.5}^{Lung} - CFcRn_{pH\ 6.0}^{Lung}) \end{aligned} \quad (16)$$

### Vascular Endothelial Cell Recycling Endosomal Space (pH=6.0)

$$\frac{dCIgFc_{recyc}^{Lung}}{dt} = \frac{1}{\tau} \cdot CIgFc_{6.0}^{Lung} - CL_{pino}^{Lung} \cdot CIgFc_{recyc}^{Lung} / V_{endo,sub}^{Lung} \quad (17)$$

$$\frac{dCmAbFc_{recyc}^{Lung}}{dt} = \frac{1}{\tau} \cdot CmAbFc_{6.0}^{Lung} - S_{pino} \cdot CL_{pino}^{Lung} \cdot CmAbFc_{recyc}^{Lung} / V_{endo,sub}^{Lung} \quad (18)$$

## Interstitial Space

$$\begin{aligned}
 V_{inter}^{Lung} \frac{dCIgG_{inter}^{Lung}}{dt} &= (1 - flgG_{recyc}) \cdot CL_{pino}^{Lung} \cdot CIgFc_{recyc}^{Lung} - CL_{pino}^{Lung} \cdot CIgG_{inter}^{Lung} - (1 - \sigma) \cdot L^{Lung} \cdot CIgG_{inter}^{Lung} \\
 &+ PS_L^{Lung} \cdot (CIgG_{vasc}^{Lung} - CIgG_{inter}^{Lung}) \cdot \frac{Pe_L}{e^{Pe_L} - 1} + PS_S^{Lung} \cdot (CIgG_{vasc}^{Lung} - CIgG_{inter}^{Lung}) \cdot \frac{Pe_S}{e^{Pe_S} - 1}
 \end{aligned} \tag{19}$$

$$\begin{aligned}
 &+ J_L^{Lung} \cdot (1 - \sigma_L) \cdot CIgG_{vasc}^{Lung} + J_S^{Lung} \cdot (1 - \sigma_S) \cdot CIgG_{vasc}^{Lung} \\
 V_{inter}^{Lung} \frac{dCmAb_{inter}^{Lung}}{dt} &= S_{pino} \cdot (1 - FR) \cdot CL_{pino}^{Lung} \cdot CmAbFc_{recyc}^{Lung} - S_{pino} \cdot CL_{pino}^{Lung} \cdot CmAb_{inter}^{Lung} - (1 - \sigma) \cdot L^{Lung} \cdot CmAb_{inter}^{Lung} \\
 &+ S_{diff-conv} \cdot PS_L^{Lung} \cdot (CmAb_{vasc}^{Lung} - CmAb_{inter}^{Lung}) \cdot \frac{Pe_L}{e^{Pe_L} - 1} + S_{diff-conv} \cdot PS_S^{Lung} \cdot (CmAb_{vasc}^{Lung} - CmAb_{inter}^{Lung}) \cdot \frac{Pe_S}{e^{Pe_S} - 1} \\
 &+ S_{diff-conv} \cdot J_L^{Lung} \cdot (1 - \sigma_L) \cdot CmAb_{vasc}^{Lung} + S_{diff-conv} \cdot J_S^{Lung} \cdot (1 - \sigma_S) \cdot CmAb_{vasc}^{Lung}
 \end{aligned} \tag{20}$$

## Liver

### Vascular space

$$\begin{aligned}
 V_{vasc}^{Liver} \frac{dCIgG_{vasc}^{Liver}}{dt} &= (Q^{GI} - L^{GI}) \cdot CIgG_{vasc}^{Liver} - (Q^{Spleen} - L^{Spleen}) \cdot CIgG_{vasc}^{Spleen} \\
 &- (Q^{Liver} - L^{Liver}) \cdot CIgG_{vasc}^{Liver} + (Q^{Liver} - Q^{GI} - Q^{Spleen} + L^{GI} + L^{Spleen}) \cdot CIgG_{vasc}^{Lung} \\
 &+ flgG_{recyc} \cdot CL_{pino}^{Liver} \cdot CIgFc_{recyc}^{Liver} - CL_{pino}^{Liver} \cdot CIgG_{vasc}^{Liver} \\
 &- PS_L^{Liver} \cdot (CIgG_{vasc}^{Liver} - CIgG_{inter}^{Liver}) \cdot \frac{Pe_L}{e^{Pe_L} - 1} - PS_S^{Liver} \cdot (CIgG_{vasc}^{Liver} - CIgG_{inter}^{Liver}) \cdot \frac{Pe_S}{e^{Pe_S} - 1} \\
 &- J_L^{Liver} \cdot (1 - \sigma_L) \cdot CIgG_{vasc}^{Liver} - J_S^{Liver} \cdot (1 - \sigma_S) \cdot CIgG_{vasc}^{Liver}
 \end{aligned} \tag{21}$$

$$\begin{aligned}
 V_{vasc}^{Liver} \frac{dCmAb_{vasc}^{Liver}}{dt} &= (Q^{GI} - L^{GI}) \cdot CmAb_{vasc}^{Liver} - (Q^{Spleen} - L^{Spleen}) \cdot CmAb_{vasc}^{Spleen} \\
 &- (Q^{Liver} - L^{Liver}) \cdot CmAb_{vasc}^{Liver} + (Q^{Liver} - Q^{GI} - Q^{Spleen} + L^{GI} + L^{Spleen}) \cdot CmAb_{vasc}^{Lung} \\
 &- S_{pino} \cdot CL_{pino}^{Liver} \cdot CmAb_{vasc}^{Liver} + S_{pino} \cdot flgG_{recyc} \cdot CL_{pino}^{Liver} \cdot CmAbFc_{recyc}^{Liver} \\
 &- S_{diff-conv} \cdot PS_L^{Liver} \cdot (CmAb_{vasc}^{Liver} - CmAb_{inter}^{Liver}) \cdot \frac{Pe_L}{e^{Pe_L} - 1} - S_{diff-conv} \cdot PS_S^{Liver} \cdot (CmAb_{vasc}^{Liver} - CmAb_{inter}^{Liver}) \cdot \frac{Pe_S}{e^{Pe_S} - 1} \\
 &- S_{diff-conv} \cdot J_L^{Liver} \cdot (1 - \sigma_L) \cdot CmAb_{vasc}^{Liver} - S_{diff-conv} \cdot J_S^{Liver} \cdot (1 - \sigma_S) \cdot CmAb_{vasc}^{Liver}
 \end{aligned} \tag{22}$$

The differential equations for the vascular endothelial cell endosomal space and interstitial space are similar to those of lung.

## Other organs

### Vascular space

$$\begin{aligned}
 V_{\text{vasc}}^{\text{Organ}} \frac{dCIgG_{\text{vasc}}^{\text{Organ}}}{dt} &= Q^{\text{Organ}} \cdot CIgG_{\text{vasc}}^{\text{Organ}} - (Q^{\text{Organ}} - L^{\text{Organ}}) \cdot CIgG_{\text{vasc}}^{\text{Organ}} \\
 &- CL_{\text{pino}}^{\text{Organ}} \cdot CIgG_{\text{vasc}}^{\text{Organ}} + fIgG_{\text{recyc}} \cdot CL_{\text{pino}}^{\text{Organ}} \cdot CIgFc_{\text{recyc}}^{\text{Organ}} \\
 &- PS_L^{\text{Organ}} \cdot (CIgG_{\text{vasc}}^{\text{Organ}} - CIgG_{\text{inter}}^{\text{Organ}}) \cdot \frac{Pe_L}{e^{Pe_L} - 1} - PS_S^{\text{Organ}} \cdot (CIgG_{\text{vasc}}^{\text{Organ}} - CIgG_{\text{inter}}^{\text{Organ}}) \cdot \frac{Pe_S}{e^{Pe_S} - 1} \\
 &- J_L^{\text{Organ}} \cdot (1 - \sigma_L) \cdot CIgG_{\text{vasc}}^{\text{Organ}} - J_S^{\text{Organ}} \cdot (1 - \sigma_S) \cdot CIgG_{\text{vasc}}^{\text{Organ}}
 \end{aligned} \tag{23}$$

$$\begin{aligned}
 V_{\text{vasc}}^{\text{Organ}} \frac{dCmAb_{\text{vasc}}^{\text{Organ}}}{dt} &= Q^{\text{Organ}} \cdot CmAb_{\text{vasc}}^{\text{Organ}} - (Q^{\text{Organ}} - L^{\text{Organ}}) \cdot CmAb_{\text{vasc}}^{\text{Organ}} \\
 &- S_{\text{pino}} \cdot CL_{\text{pino}}^{\text{Organ}} \cdot CmAb_{\text{vasc}}^{\text{Organ}} + S_{\text{pino}} \cdot fIgG_{\text{recyc}} \cdot CL_{\text{pino}}^{\text{Organ}} \cdot CmAbFc_{\text{recyc}}^{\text{Organ}} \\
 &- S_{\text{diff-conv}} \cdot PS_L^{\text{Organ}} \cdot (CmAb_{\text{vasc}}^{\text{Organ}} - CmAb_{\text{inter}}^{\text{Organ}}) \cdot \frac{Pe_L}{e^{Pe_L} - 1} - S_{\text{diff-conv}} \cdot PS_S^{\text{Organ}} \cdot (CmAb_{\text{vasc}}^{\text{Organ}} - CmAb_{\text{inter}}^{\text{Organ}}) \cdot \frac{Pe_S}{e^{Pe_S} - 1} \\
 &- S_{\text{diff-conv}} \cdot J_L^{\text{Organ}} \cdot (1 - \sigma_L) \cdot CmAb_{\text{vasc}}^{\text{Organ}} - S_{\text{diff-conv}} \cdot J_S^{\text{Organ}} \cdot (1 - \sigma_S) \cdot CmAb_{\text{vasc}}^{\text{Organ}}
 \end{aligned} \tag{24}$$

The differential equations for the vascular endothelial cell endosomal space and interstitial space are similar to those of lung.

### References

- Li T, Balthasar JP (2019) Application of Physiologically Based Pharmacokinetic Modeling to Predict the Effects of FcRn Inhibitors in Mice, Rats, and Monkeys. *J Pharm Sci* 108:701–713. <https://doi.org/10.1016/j.xphs.2018.10.065>
